# Supplementary material for: Anisomycin inhibits angiogenesis in ovarian cancer by attenuating the molecular sponge effect of the lncRNA-Meg3/miR-421/PDGFRA axis
Source: PubMed Central journal article supplement — Int J Oncol. 2019 Sep 30;55(6):1296–312. doi: 10.3892/ijo.2019.4887 (PMC6831202; doi:10.3892/ijo.2019.4887), 2019-09-30

Figure S1. Reverse transcription-quantitative PCR analysis of cells transfected miR-421 mimics. (A) Results confirmed that the expression levels of miR-421 were significantly increased in HuOCSCs transfected with a miR-421 mimic, compared with cells transfected with the control miR-mut or with untransfected cells. (B) Effects of miR-421 mimic transfection on lncRNA-Meg3 and PDGFRA expression levels. \*\* $P < 0.01$  vs. untransfected group (one-way ANOVA;  $n=4$ ). miR, microRNA; HuOCSCs, human ovarian cancer stem cells; mut, mutant; lncRNA, long non-coding RNA; Meg3, maternally expressed 3; PDGFRA, platelet derived growth factor receptor  $\alpha$ .

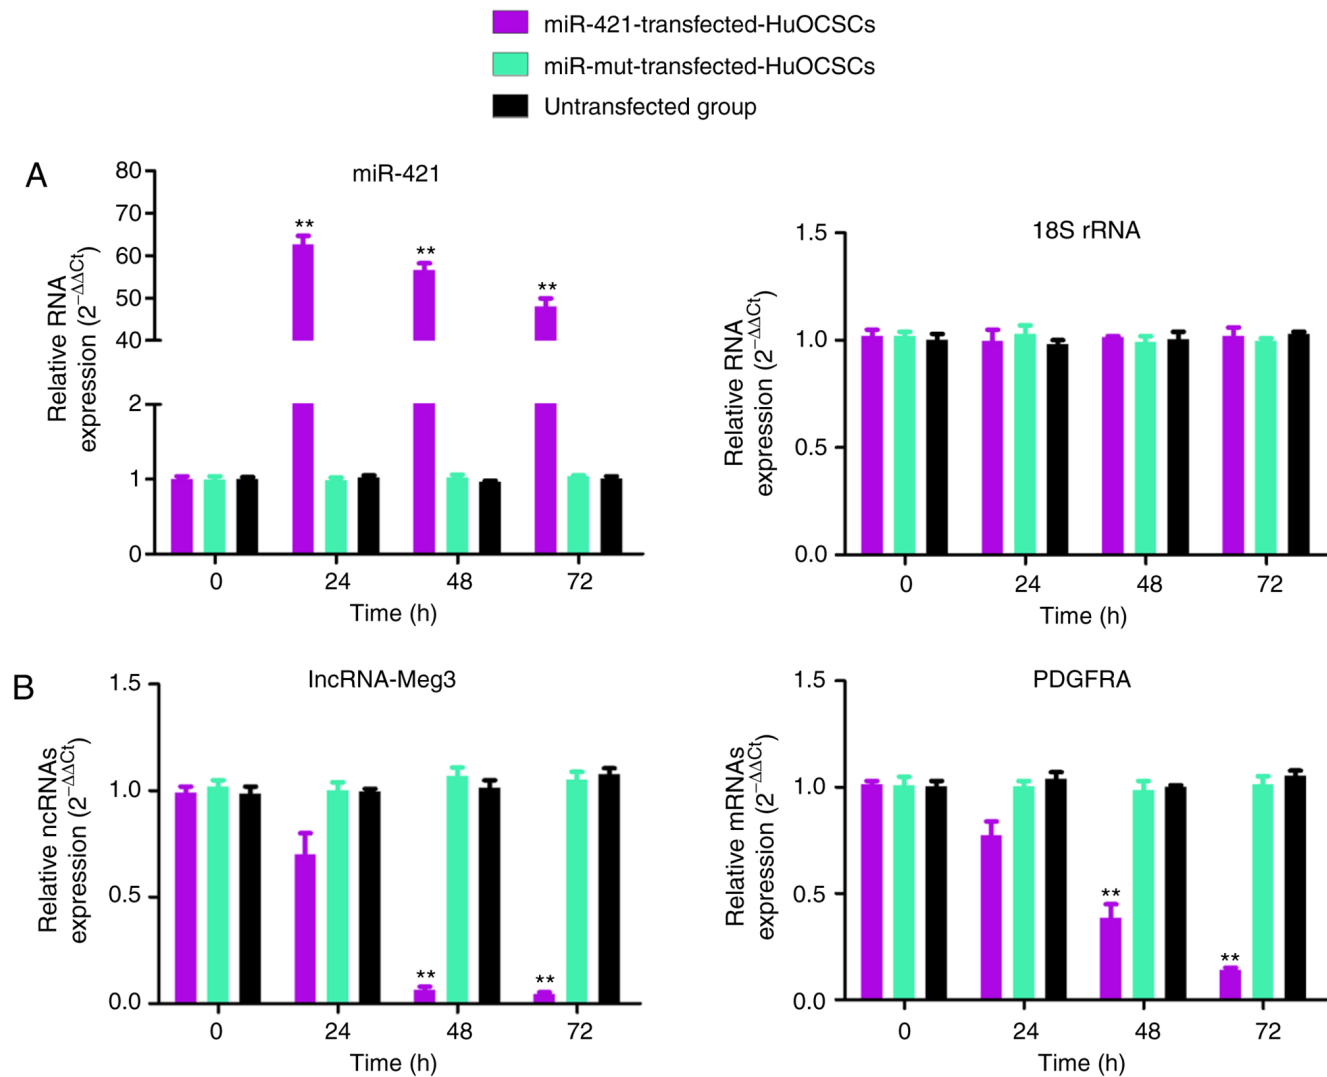

Supplement: Supplementary_Data.pdf [file Supplementary_Data.pdf]
